# Supplementary material
Source: PubMed Central journal article supplement (PMC4256154)
Supplement: NIHMS639922-supplement.pdf [file NIHMS639922-supplement.pdf]

## Supplemental Data:

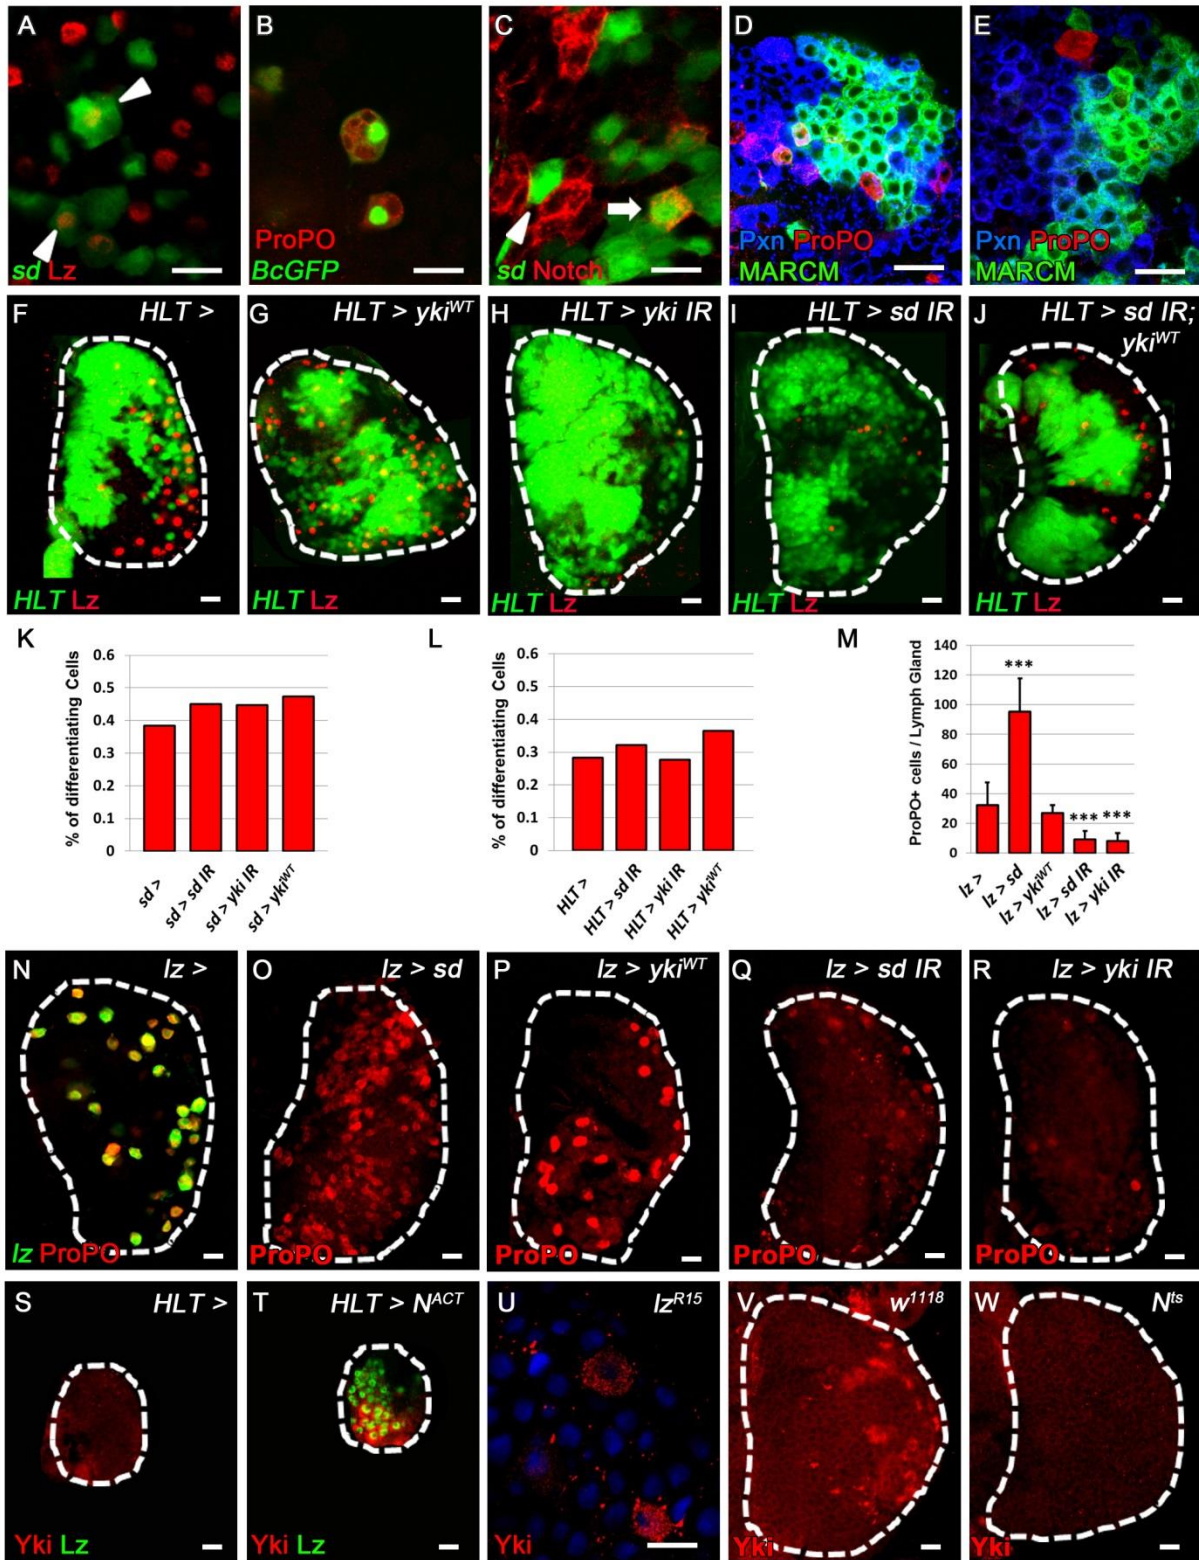

**Figure S1, related to Fig. 1: Yorkie and Scalloped promote crystal cell formation.** (A) *sd* (green) and Lz (red) expression in the CZ of a 3<sup>rd</sup> instar lymph gland. (B) Mature CC marker ProPO (red) is co-expressed in CCs labeled with *Black-cells (Bc)GFP* (green) (C) *sd* (green) co-localizes with Notch (red, arrow), and in adjacent cells (arrowheads). (D) CCs (ProPO, red) are observed within control MARCM clones (green, overlap yellow) in the CZ (Peroxidasin, Pxn, blue) of 3<sup>rd</sup> instar lymph glands, but are not observed in (E) *sd* mutant clones. (F-J) *HLT* clonal expression in the lymph gland (green). CCPs are labeled with Lz (red) (K-L) Quantification of changes to differentiation upon *yki* and *sd* manipulation in the lymph gland with *sd-gal4* (K) and *HLT* (L) (M) Quantification of Fig. S1N-R (n=10) (N) WT lymph gland. *Lz-gal4 >UAS-GFP* (green) labels CCPs and ProPO (red) labels mature CCs. (O) Over-expression of *sd* in CCPs (*lz-gal4 >*) increases CC numbers while (P) over-expression of *yki*<sup>WT</sup> has no effect. (Q) Depletion of *sd* and (R) *yki* leads to significant loss of mature CCs. (S) WT 2<sup>nd</sup> instar LG does not express crystal cell markers Yki (red) and Lz (green). (T) Over-expression of Notch Activated (*HLT > UAS-N<sup>Act</sup>*) drives ectopic expression of Yki (red) and Lz (green). (U) Yki (red) is expressed in *lz<sup>r15</sup>* mutant lymph glands, nuclear marker (blue). (V) Yki (red) expression in 3<sup>rd</sup> instar lymph gland. (W) Yki expression is not observed in *N<sup>ts</sup>* mutant lymph glands raised at non-permissive temperature. Scale bar 10 μm.

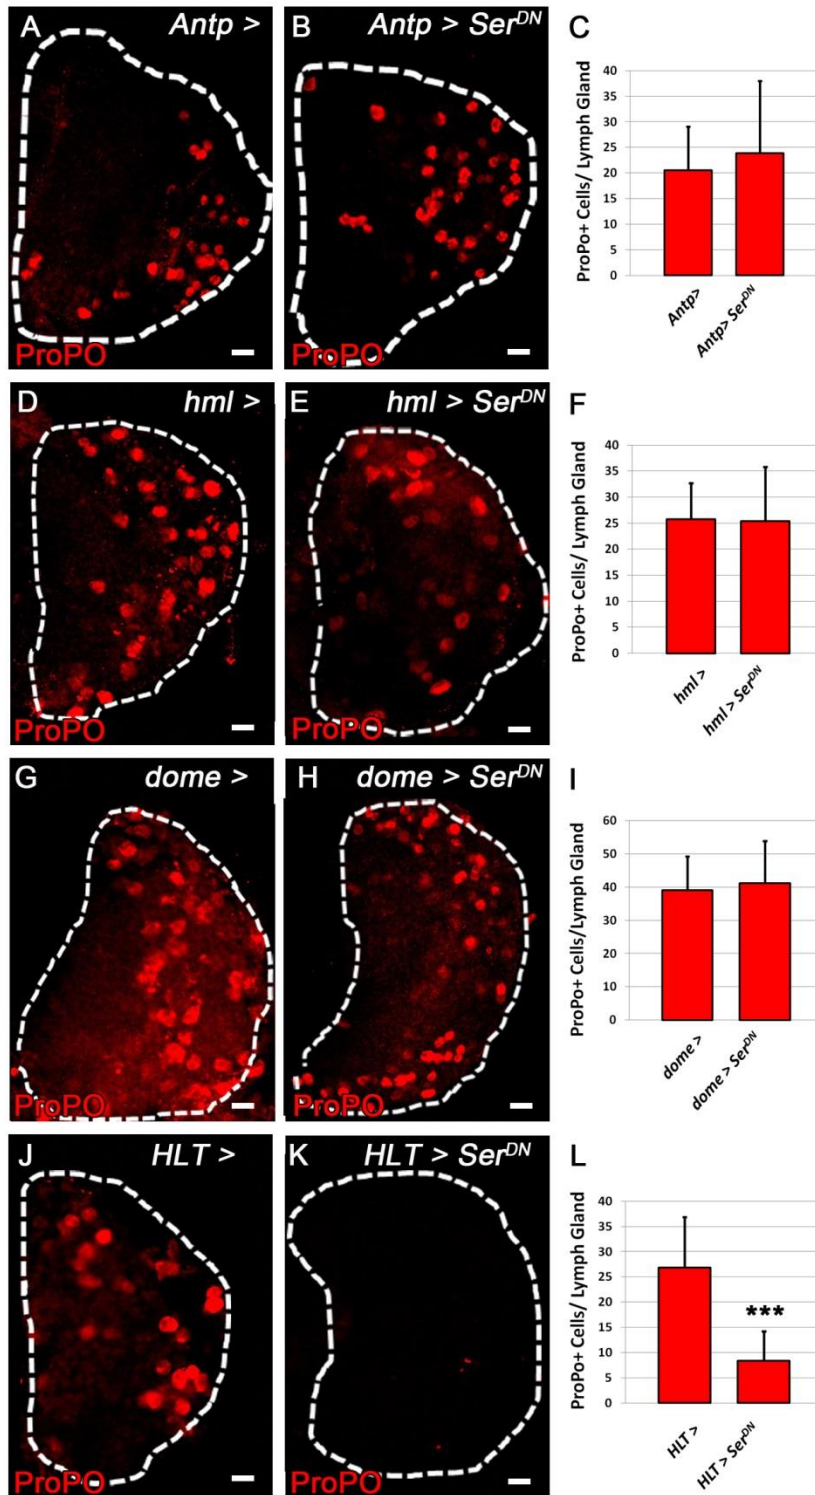

**Figure S2, related to Fig. 2: Inhibition of Serrate in different populations of cells within the lymph gland. (A) WT lymph gland. (B) PSC specific inhibition of Serrate (*Antp-gal4* > *Ser<sup>DN</sup>*)**

does not block crystal cell differentiation. (C) Quantification of Serrate inhibition in the PSC. (n=10) (D) WT lymph gland. (E) Inhibition of Serrate (*hml-gal4 > Ser<sup>DN</sup>*) in differentiating hemocytes does not block crystal cell differentiation. (F) Quantification of Serrate inhibition in the CZ. (n=10) (G) WT lymph gland. (H) Inhibition of Serrate (*dome-gal4 > Ser<sup>DN</sup>*) in prohemocytes does not block crystal cell differentiation. (I) Quantification of Serrate inhibition in the Medullary Zone. (n=10) (J) WT LG. (K) Inhibition of Serrate throughout the lymph gland (*HLT > Ser<sup>DN</sup>*) significantly blocks crystal cell differentiation. (L) Quantification of Serrate Inhibition. (n=10) \*\*\* indicates pValue <.001. Scale bar 10  $\mu$ m.

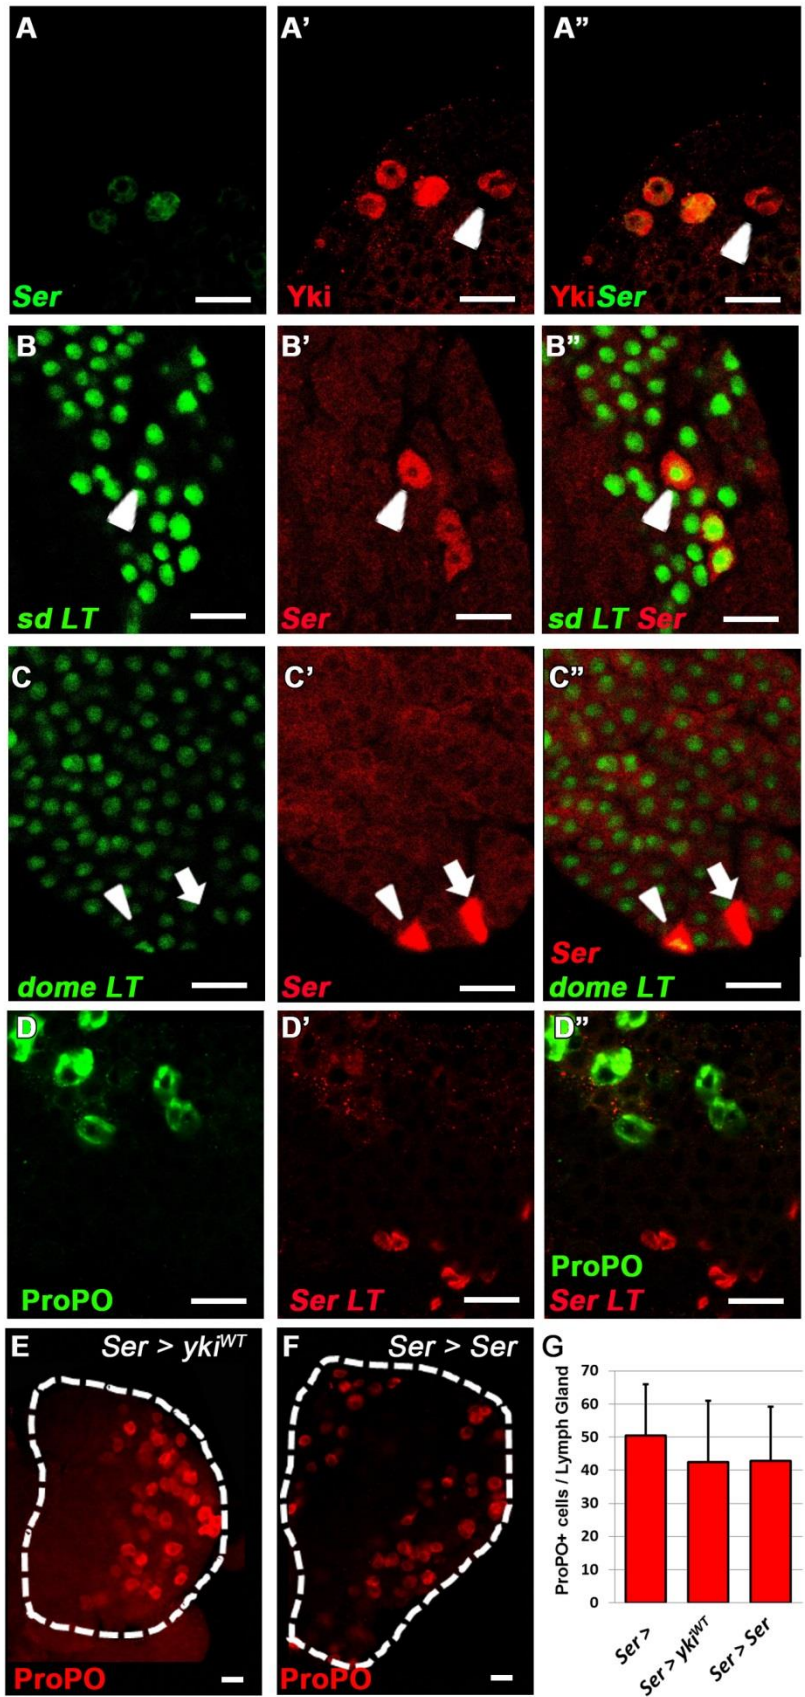

**Figure S3, related to Fig. 3: Characterization of Lineage Specifying Cells.** (A-A'') *Ser* (A, green) and *Yki* (A', red) co-localize (A'', yellow), but not in all *Yki*<sup>+</sup> cells (Arrowhead). (B-B'') Lineage traced *sd*<sup>+</sup> cells (B, green) and *Ser* (B', red) co-localize (B'', yellow, Arrowhead). (C-C'') Lineage traced *dome*<sup>+</sup> cells (B, green) and *Ser* (B', red) co-localize (B'', yellow, Arrowhead), but not all *Ser*<sup>+</sup> cells are traced from *dome* (Arrow). (D-D'') ProPO<sup>+</sup> CCs (D, green) do not co-localize with lineage traced *Ser*<sup>+</sup> cells (D', red). (E-G) Overexpression of (E) *yki*<sup>WT</sup> or (F) *Ser* in *Ser*<sup>+</sup> cells (*Ser-gal4* >) does not affect crystal cell (ProPO, red) differentiation. (G) Quantification of Fig. S3E-F (n=10). Scale bar 10 μm.

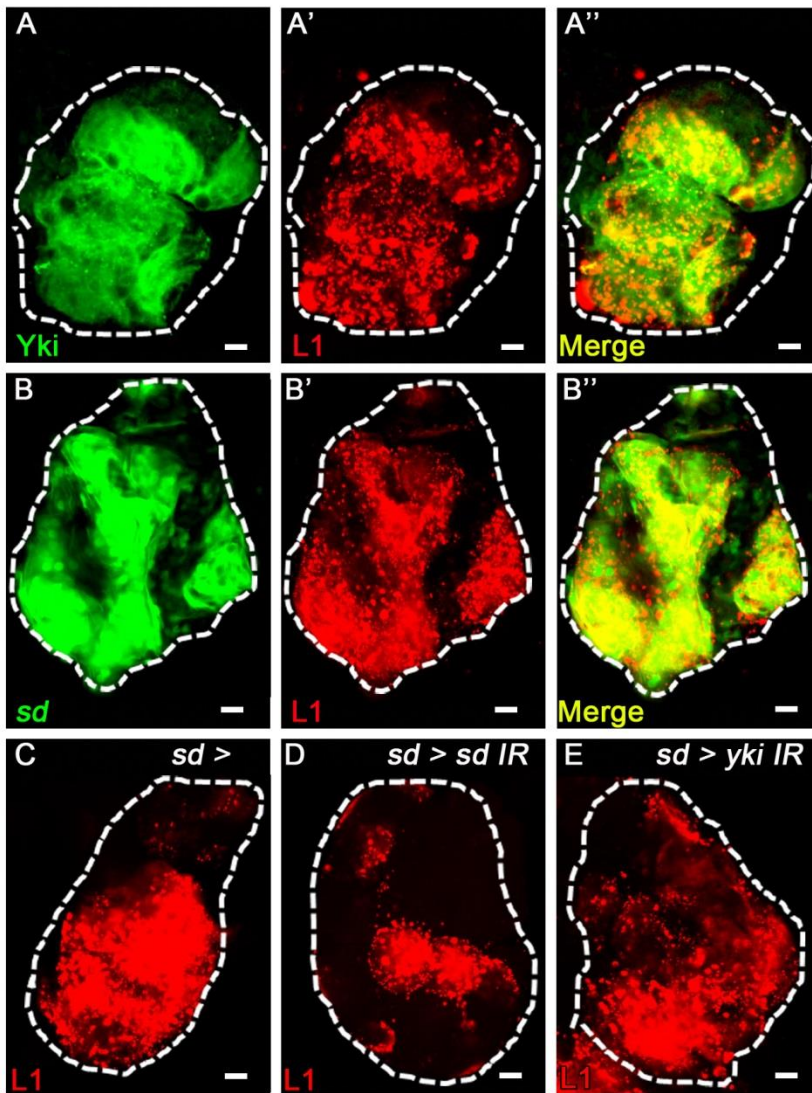

**Figure S4, related to Fig. 4: Scalloped and Yorkie in lamellocytes.** (A-A'') Yki (A, green) is strongly expressed in lamellocytes labelled with L1 (A', red). (B-B'') *sd* (B, green) is strongly expressed in lamellocytes labelled with L1 (B', red). (C-E) Lamellocytes labelled with L1 in wasp parasitized lymph gland. (C) WT lymph gland. (D) Depletion of *sd* or (E) *yki* with *sd-gal4* does not affect lamellocyte formation.

## Supplemental Experimental Procedures:

### Immunohistochemistry (continued):

The following primary antibodies were used: mouse anti-Notch<sup>ECD</sup> (Developmental Studies Hybridoma Bank, DSHB) (1:5), mouse anti-Lozenge (concentrated, DSHB) (1:40), rabbit anti-Prophenoloxidase (gift from Mike Kanost) (1:200), mouse anti-Peroxidasin (gift from J. Fessler) (1:400), mouse anti-GFP (Abcam) (1:100), mouse anti-L1 (gift from Istvan Ando) (1:20), mouse anti- $\beta$  Galactosidase (Millipore) (1:20), rabbit anti-Yorkie (gift from Kenneth Irvine) (pre-absorbed in cuticle at 1:200). The following secondary antibodies were used: anti-Mouse Cy3 (Jackson ImmunoResearch) (1:400), anti-Mouse Alexa Fluor648 (Jackson ImmunoResearch) (1:400), anti-Mouse FITC (Jackson ImmunoResearch) (1:100), anti-Rabbit Cy3 (Jackson ImmunoResearch) (1:400), anti-Rabbit Alexa Fluor648 (Jackson ImmunoResearch) (1:400).

*TUNEL staining:* We modified the *In Situ cell death detection kit, TMR red* (Roche) protocol as follows: Larvae were dissected in PBS and fixed in 3.7% formaldehyde for 20 minutes at room temperature. LGs were then permeabilized in 0.4% PBT with 4 X 15 minute washes at RT. LGs were then further permeabilized in 100mM NaCitrate + 0.1% PBT (pH 6.0) on ice for 3 minutes and rinsed in PBS for 4X10 minutes. The TUNEL solution was made by combining Label Solution with Enzyme Solution at a 10:1 ratio. The plate containing tissues in TUNEL solution was incubated at 37°C for 1 hour and 15 minutes. At the end of incubation lymph glands were rinsed in 0.1% PBT for 6 X 5 minutes in glass wells, and mounted in Vectashield Mounting Medium.



*MARCM clones*: Female flies carrying the *sd*<sup>A7M</sup> mutation were mated to MARCM 19A males and allowed to lay eggs. 24 hours after egg-laying, the embryos were heat shocked at 29 degrees Celsius in a water bath for 2 hours. Larvae were then raised at RT and dissected at the wandering stage of the 3<sup>rd</sup> instar. Lymph Glands with control or *sd* clones in the Cortical Zone (Peroxidasin+) were scored based upon the presence or absence of crystal cells (ProPO+) within the clone. ProPO+ cells were observed in 9/20 control clones compared to 1/12 *sd* clones (pValue < .05).

All statistical analyses of crystal cell numbers were achieved using a Two-tailed Student's *t*-test. Lamellocyte quantification was determined by the percentage of Lymph Glands containing lamellocytes in WT (*dome* >) or enforced *Ser* expression (*dome* > *Ser*).

**Wasp Parasitization:** 8-10 female *L. boulandi* wasps and 5-6 male wasps were added to vials containing second instar *Drosophila* larvae, and were allowed to develop at 25°C. Wandering third instar larvae parasitized by wasp larvae were then dissected.

### ***Drosophila* stocks:**

The following stocks were used: *hml-gal4, UAS-2xEGFP; lz-gal4, UAS-mCD8::GFP ; Antp-gal4, UAS-2xEGFP ; Ser-gal4, UAS-GFP; G-TRACE; dome-gal4, UAS-2xEGFP; dome-gal4; gal80<sup>ts</sup>; Hand-gal4, UAS-2xEGFP, UAS-FLP; A5C-FRT-STOP-FRT-GAL4 (HLT) ; Notch<sup>ts</sup> (U. Banerjee); UAS-FLP; A5C-FRT-STOP-FRT-LacZ; *sd-gal4* (DGRC#113-596); *UAS-yki IR(4005R-1)*; *UAS-yki<sup>WT</sup>*; *UAS-sd; UAS-2xEYFP; UAS-dicer2; UAS-Ser IR(#28713)* (Bloomington Stock Center); *UAS-yki IR; UAS-sd IR; diap1-GFP(3.5)*(J.Jiang); *UAS-N<sup>Act</sup>* (S.*

Artavanis-Tsakonas); *UAS-Ser*; *UAS-Ser<sup>DN</sup>*; *SerLacZ* (E. Knust); *sd<sup>47M</sup> FRT19A* (D. Pan); and *hsflp, tubgal80 FRT19A/FM7*; *tub > mCD8::*GFP/TM3*, Ser* (B. Ohlstein), *Black cells-GFP* (Robert Schulz).
